# Supplementary material
Source: publisher site journal article supplement (https://studysites.uk.sagepub.com/gribben/Web%20Material%20(Appendix)/Gribben_Web%20Material%20(Appendix)_Ch-06.pdf)
Supplement: Supplementary file 1 [file Gribben_Web%20Material%20(Appendix)_Ch-06.pdf]

## Appendix 6: Sample dissertation layout

### Faculty standard page

Personal and course details such as matriculation number

Given out by faculty

Completed by student

### Title page

Dissertation title

### Acknowledgements

Thanks to those who contributed to the study; personal, environmental or financial resources

### Abstract

Briefly summarises the dissertation  
Gives an overview of the research study including the conclusions

### Contents

Lists chapter titles and page numbers  
Lists additional information used: appendices, tables, glossary, illustrations, figures

### Chapter 1: Introduction

The context  
Aims and objectives  
Research problem  
Hypothesis  
Research procedures: collect and analyse data  
Methodology  
Limitations of study  
The study's contribution to current knowledge

10 per cent of total word limit

### Chapter 2: Literature review

Reviews existing literature (research studies and other hard-copy and online resources) containing the main themes of your research  
Summarises and critically evaluates what's previously been researched and reported on around these themes  
Highlights gaps in literature

25 per cent of total word limit

### **Chapter 3: Methodology**

Presents scope and sample size of your study  
Describes, evaluates and justifies your choice of methodology, research tools and data analysis procedures used in your research

15–20 per cent of total word limit

### **Chapter 4: Data presentation**

Presents the raw data only (not a discussion of it) – what was observed, gathered and discovered; patterns and trends  
Contains tables, charts or similar graphical information with relevant headings

10–15 per cent of total word limit

### **Chapter 5: Data analysis, interpretation and discussion**

Supports your research  
Presents an analysis and interpretation of the findings  
Highlights the relationship between the hypothesis and the patterns and trends that emerged in the findings  
Discusses how these findings differ from those of other studies  
Discusses the differences or similarities between other authors' views  
States how the findings have changed the way you think about the topic  
States how the findings can influence other studies

20 per cent of total word limit

### **Chapter 6: Summary and conclusion**

Summarises main research findings  
Presents conclusions  
Suggests directions for further research  
Lists recommendations

10 per cent of total word limit

### **References**

Lists appendices numerically or alphabetically  
Alphabetically lists sources used – bibliography and cited references
